# Supplementary material for: Neoadjuvant Chemotherapy Modulates the Immune Microenvironment in Metastases of Tubo-Ovarian High-Grade Serous Carcinoma
Source: Oxford University Press journal article supplement (doi:10.1158/1078-0432.ccr-15-2657), 2016-06-14
Supplement: 10780432ccr152657-sup-156931_2_supp_3326354_k1kbtk.xlsx [file 10780432ccr152657-sup-156931_2_supp_3326354_k1kbtk.xlsx]

## Sheet: Sheet1
	Supplementary table 1
	Feature	NACT cohort (n=54)
	Response to NACT - CRS response classification#
	CRS3: good response – n (%)	17 (31)
	CRS2: bad response – n (%)	37 (69)
	Age - years
	Median (range)	66 (35-85)
	Origin of cancer – n (%)
	Ovary/Fallopian tube	40 (74)
	Primary peritoneal	14 (26)
	Histology – n (%)
	High grade serous	54 (100)
	FIGO stage – n (%)
	IIIC	38 (70)
	IV	16 (30)
	CA125 before NACT - median (min-max)	842 (75 - 30800)
	Cycles of neoadjuvant chemotherapy – n (%)
	3 or 4 cycles	49 (91)
	>4 cycles	5 (9)
	Regimen of neoadjuvant chemotherapy – n (%)
	Carboplatin+Paclitaxel*	46* (85)
	Carboplatin	8 (15)
	* Four patients received Carboplatin/Paclitaxel/Bevacizumab as neoadjuvant regimen
