# Supplementary material for: Neoadjuvant Chemotherapy Modulates the Immune Microenvironment in Metastases of Tubo-Ovarian High-Grade Serous Carcinoma
Source: Oxford University Press journal article supplement (doi:10.1158/1078-0432.ccr-15-2657), 2016-06-14
Supplement: 10780432ccr152657-sup-156931_2_supp_3326355_81kbtk.xlsx [file 10780432ccr152657-sup-156931_2_supp_3326355_81kbtk.xlsx]

## Sheet: Sheet1
	Supplementary table 2
	Feature	PDS cohort (n=6)
	Age - years	67.5 (57-79)
	Origin of cancer – n (%)
	Ovary/Fallopian tube	5 (83)
	Primary peritoneal	1 (17)
	High grade serous	6 (100)
	FIGO stage – n (%)
	IIIC	5 (83)
	IV	1 (17)
	CA125 before PDS - median (min-max)	254 (37 - 3409)
