# Supplementary material for: Neoadjuvant Chemotherapy Modulates the Immune Microenvironment in Metastases of Tubo-Ovarian High-Grade Serous Carcinoma
Source: Oxford University Press journal article supplement (doi:10.1158/1078-0432.ccr-15-2657), 2016-06-14
Supplement: 10780432ccr152657-sup-156931_2_supp_3326356_91kbtk.xlsx [file 10780432ccr152657-sup-156931_2_supp_3326356_91kbtk.xlsx]

## Sheet: Sheet1
	Supplementary table 3
	Experiment	Total	Pre	Post CRS3	Post CRS2	Paired
	IHC Cell Density	50	25	7	18	Yes
	IHC PD-L1	52	26	6	20	Yes
	Plasma Cytokines	46	23	3	20	Yes
	RNA Sequencing Metastases	20	4	9	7	No
	Flow CD4+ and CD8+ T-cells	22	6	4	12	No
	Flow Tregs	22	6	3	13	No
	Flow Cytokines CD4+ T-cells	11	3	5	3	No
	Flow Cytokines CD8+ T-cells	11	3	5	3	No
	Flow PD-1+ and CTLA4+ T-cells	22	6	4	12	No
